# Supplementary material
Source: publisher figshare collection journal article supplement (https://gsajournals.figshare.com/ndownloader/files/14127245)
Supplement: Supplementary file 1 [file 14127245]

## Sheet: Sheet1
	Trinity	Khmer_Trinity	Trinity_ DRAP	Oases_DRAP
Complete BUSCOs (C)	1272 (88.4%)	1281 (88.9%)	1303 (90.5%)	1315 (91.4%)
Complete and single-copy BUSCOs (S)	482 (33.5%)	503 (43.9%)	1114 (77.4%)	1176 (81.7%)
Complete and duplicated BUSCOs (D)	790 (54.9%)	778 (54.0%)	189 (13.1%)	139 (9.7%)
Fragmented BUSCOs (F)	87 (6.0%)	89 (6.2%)	47 (3.3%)	34 (2.4%)
Missing BUSCOs (M)	81 (5.6%)	70 (4.9%)	90 (6.2%)	91 (6.2%)
Total BUSCO groups searched	1440	1440	1440	1440
